# Supplementary material
Source: publisher figshare collection journal article supplement (https://gsajournals.figshare.com/articles/dataset/_/23705928)
Supplement: Supplementary file 1 [file 1]

## Sheet: LEGEND
Guide to Columns in Tab "Mutant Raw Data"			Guide to Columns in Tab "Mutant Summary"			Guide to Columns in Tab "SN152+ Raw Data"			Guide to Columns in Tab "SN152+ Summary"
Column	Description		Description			Column	Description		Description
Standard Name	CGD standard gene name (03/22/2023)		Data presented in this tab is the summary of the strains presented in the tab "Mutant Raw Data". Data is organized by the mean normalized accumulation for whole cultures, pellet fractions, supernant fractions and supernatant /pellet ratios of E,E-farnesol +/- standard deviation (SD) for each mutant (n=6) using source data from tab "Mutant Raw Data". Log2 fold change values are also provided in re…			Strain	A wild-type control strain was created by reintroduction of a single allele of HIS1 and LEU2 into the parent strain (Homann et al. 2009). Throughout this paper, we refer to this control strain simply as SN152+.		Data presented in this tab is the mean normalized accumulation for whole cultures, pellet fractions, supernant fractions and supernatant /pellet ratios of E,E-farnesol +/- standard deviation (SD) for SN152+ using source data from tab "SN152+ Raw Data". Means are provided for the batches (n=22) and biological replicates combined (n=56)
Biological Replicate	Independent replicate culture number					Plate	Strain location on X or Y plate from Fungal Genetics Stock Center
Plate	Strain location on X or Y plate from Fungal Genetics Stock Center					Batch	Group of SN152+ replicates that were assayed on the same day
Normalized Farnesol (Whole)	Dry weight normalized E,E-farnesol accumulation in whole cultures					Biological Replicate	Independent replicate culture number
Normalized Farnesol (Pellet)	Dry weight normalized E,E-farnesol accumulation in the pellet fraction					Normalized Farnesol (Whole)	Dry weight normalized E,E-farnesol accumulation in whole cultures
Normalized Farnesol (Supernatant)	Dry weight normalized E,E-farnesol accumulation in the supernatant fraction					Normalized Farnesol (Pellet)	Dry weight normalized E,E-farnesol accumulation in the pellet fraction
FOH Whole LOG2 Fold Change vs Control	Whole culture E,E-farnesol log2 fold change accumulation vs mean SN152+ accumulation value					Normalized Farnesol (Supernatant)	Dry weight normalized E,E-farnesol accumulation in the supernatant fraction
FOH Pellet LOG2 Fold Change vs Control	Pellet fraction E,E-farnesol log2 fold change accumulation vs mean SN152+ accumulation value					FOH S:P	Ratio of E,E-farnesol accumulation in supernatant and pellet
FOH Supernatant LOG2 Fold Change vs Control	Supernatant fraction E,E-farnesol log2 fold change accumulation vs mean SN152+ accumulation value					FOH WPS Relative Error	E,E-farnesol WPS relative error values (W-(P+S)/W). Abbrevations: whole culture (W), pellet (P), supernatant (S)
FOH Supernatant to Pellet Ratio	Ratio of E,E-farnesol accumulation in supernatant and pellet					Batch Mean FOH whole	Mean whole culture SN152+ E,E-farnesol accumulation per batch
						Batch Mean FOH pellet	Mean pellet fraction SN152+ E,E-farnesol accumulation per batch
						Batch Mean FOH supernatant	Mean supernatant fraction SN152+ E,E-farnesol accumulation per batch
						FOH S:P Batch Mean	Mean SN152+ supernant to pellet ratio for farnesol per batch

## Sheet: Mutant Raw Data
Standard Name	Biological Replicate	Plate	Normalized Farnesol (Whole)	Normalized Farnesol (Pellet)	Normalized Farnesol (Supernatant)	FOH Whole LOG2 Fold Change vs Control	FOH Pellet LOG2 Fold Change vs Control	FOH Supernatant LOG2 Fold Change vs Control	FOH Supernatant to Pellet Ratio
CR_02120C	1	X	3.74384	4.15335	0.508024	-0.209333	0.054829	0.190088	0.122317
CR_02120C	2	X	8.30666	7.77042	0.682148	0.940415	0.958545	0.615277	0.0877878
CR_02120C	3	X	3.68604	3.50086	0.393585	-0.23178	-0.191737	-0.178134	0.112425
CR_02120C	1	Y	5.9488	5.61449	0.659148	0.458747	0.489708	0.565793	0.117401
CR_02120C	2	Y	6.72089	6.03952	0.633595	0.6348	0.594986	0.508751	0.104908
CR_02120C	3	Y	6.33516	5.68697	0.64819	0.549528	0.508213	0.541607	0.113978
FGR15	1	X	4.80114	4.05343	0.393844	0.149524	0.0196946	-0.177186	0.0971631
FGR15	2	X	5.29597	4.44823	0.473224	0.291043	0.153783	0.0877144	0.106385
FGR15	3	X	3.18226	3.24397	0.298856	-0.443802	-0.301686	-0.575356	0.0921267
FGR15	4	X	4.14109	3.91951	0.461899	-0.0638439	-0.0287757	0.052768	0.117846
FGR15	5	X	4.61321	4.27357	0.503674	0.0919182	0.0959952	0.177683	0.117858
FGR15	6	X	4.00898	3.64017	0.417406	-0.110616	-0.135441	-0.0933562	0.114667
GZF3	1	X	1.34687	1.47995	0.1442	-1.68424	-1.4339	-1.62674	0.0974359
GZF3	2	X	2.15384	1.86329	0.186543	-1.00694	-1.10159	-1.2553	0.100115
GZF3	3	X	1.30343	1.48248	0.068563	-1.73154	-1.43144	-2.69931	0.0462489
GZF3	1	Y	1.94291	1.96945	0.174837	-1.15564	-1.02165	-1.3488	0.0887744
GZF3	2	Y	1.76276	1.85826	0.15007	-1.29601	-1.10549	-1.56917	0.0807582
GZF3	3	Y	2.12654	2.22218	0.179419	-1.02534	-0.847472	-1.31147	0.0807403
STP2	1	X	6.95029	6.83084	0.875537	0.683221	0.772617	0.97536	0.128174
STP2	2	X	5.92926	5.74085	0.64252	0.454	0.521816	0.528933	0.111921
STP2	3	X	3.95053	4.23087	0.609763	-0.131808	0.0815069	0.45344	0.144122
STP2	4	X	5.44406	4.98948	0.676037	0.330831	0.319441	0.602293	0.135493
STP2	5	X	6.16496	5.53112	0.84985	0.51024	0.468125	0.9324	0.153649
STP2	6	X	5.69434	4.95857	0.757775	0.395675	0.310476	0.766961	0.152821
C1_02720W	1	X	3.56212	3.38234	0.408854	-0.281118	-0.241425	-0.123222	0.120879
C1_02720W	2	X	6.08331	5.41758	0.617524	0.491005	0.438201	0.471685	0.113985
C1_02720W	3	X	2.34416	2.80348	0.251849	-0.884781	-0.512228	-0.822248	0.0898345
C1_02720W	1	Y	4.01581	4.3738	0.435468	-0.108163	0.12944	-0.0322415	0.0995629
C1_02720W	2	Y	7.02686	5.64547	0.641247	0.699028	0.497648	0.526072	0.113586
C1_02720W	3	Y	6.05009	5.60655	0.742311	0.483104	0.487667	0.737215	0.132401
AHR1	1	X	23.5009	20.7759	3.3314	2.44079	2.37739	2.90325	0.160349
AHR1	2	X	18.2563	16.0378	2.1701	2.07647	2.00396	2.28488	0.135311
AHR1	3	X	12.221	12.9109	1.88811	1.49744	1.69107	2.08407	0.146242
AHR1	1	Y	25.2059	21.1987	2.6105	2.54184	2.40646	2.55145	0.123144
AHR1	2	Y	26.3776	20.9821	3.1627	2.60739	2.39164	2.82827	0.150733
AHR1	3	Y	23.6839	22.0677	2.89541	2.45198	2.46442	2.70089	0.131206
ASH1	1	X	5.6391	6.39105	0.892282	0.381611	0.676607	1.00269	0.139614
ASH1	2	X	9.71552	7.97903	0.846988	1.16644	0.996767	0.927532	0.106152
ASH1	3	X	4.92701	5.03547	0.581865	0.186861	0.332679	0.385876	0.115553
ASH1	1	Y	9.82667	8.15531	0.936567	1.18285	1.02829	1.07257	0.114841
ASH1	2	Y	8.4568	6.97501	0.855743	0.966259	0.802749	0.94237	0.122687
ASH1	3	Y	8.85174	7.12749	1.00638	1.03211	0.833947	1.1763	0.141197
SWI4	1	X	36.5504	29.8901	6.54124	3.07796	2.90215	3.87668	0.218843
SWI4	2	X	35.4194	30.6764	4.95088	3.03261	2.93961	3.4748	0.16139
SWI4	3	X	24.0424	21.3321	4.03276	2.47366	2.41551	3.17889	0.189047
SWI4	1	Y	21.1028	17.7808	2.96279	2.28551	2.1528	2.73408	0.166628
SWI4	2	Y	19.6831	18.1535	2.78085	2.18503	2.18273	2.64265	0.153185
SWI4	3	Y	21.9994	17.6329	2.89829	2.34554	2.14075	2.70232	0.164369
NRG1	1	X	10.6848	11.5769	1.28615	1.30364	1.53373	1.53018	0.111096
NRG1	2	X	11.8461	15.3971	1.51871	1.45249	1.94514	1.76996	0.0986358
NRG1	3	X	10.1461	13.1985	1.3368	1.22899	1.72285	1.5859	0.101284
NRG1	1	Y	20.4295	16.0083	3.28534	2.23873	2.0013	2.88316	0.205227
NRG1	2	Y	16.9769	16.4325	1.69689	1.97165	2.03903	1.93001	0.103265
NRG1	3	Y	19.4651	16.4862	1.60316	2.16897	2.04374	1.84804	0.0972428
CAS5	1	X	2.08282	1.72469	0.361359	-1.05531	-1.21311	-0.301374	0.209522
CAS5	2	X	1.77995	1.49412	0.238819	-1.28201	-1.42015	-0.89889	0.15984
CAS5	3	X	1.90207	1.98388	0.363565	-1.18628	-1.01112	-0.292594	0.18326
CAS5	1	Y	1.74798	1.46968	0.239912	-1.30816	-1.44395	-0.892306	0.163241
CAS5	2	Y	1.95164	1.08976	0.304432	-1.14916	-1.87543	-0.548687	0.279357
CAS5	3	Y	2.22767	1.57292	0.396121	-0.958319	-1.346	-0.168867	0.251838
FCR1	1	X	2.32964	2.53774	0.182205	-0.893747	-0.655905	-1.28925	0.0717981
FCR1	2	X	2.06253	1.8599	0.161063	-1.06944	-1.10422	-1.46718	0.0865976
FCR1	3	X	1.37479	1.13831	0.124341	-1.65464	-1.81255	-1.8405	0.109233
FCR1	1	Y	0.740796	0.924417	0.0520116	-2.5467	-2.11283	-3.0979	0.0562642
FCR1	2	Y	0.681355	0.80731	0.0527517	-2.66737	-2.30825	-3.07752	0.0653426
FCR1	3	Y	0.556979	0.507036	0.000172597	-2.95816	-2.97929	-11.3332	0.000340403
TUP1	1	X	3.94084	3.5487	0.325755	-0.13535	-0.172157	-0.45102	0.0917956
TUP1	2	X	4.69578	2.7891	0.393595	0.117511	-0.519649	-0.178096	0.141119
TUP1	3	X	4.55509	5.51186	0.477689	0.0736274	0.463092	0.101262	0.0866656		#REF!
TUP1	1	Y	4.89614	4.84553	0.793212	0.177792	0.277208	0.832898	0.1637
TUP1	2	Y	3.70946	3.71232	0.336585	-0.222642	-0.107125	-0.403839	0.0906668		#REF!
TUP1	3	Y	4.26766	4.51866	0.424063	-0.020407	0.176447	-0.070529	0.0938472
SSN6	1	X	9.05722	7.14598	1.31372	1.06522	0.837685	1.56078	0.18384
SSN6	2	X	10.6947	8.68275	1.61345	1.30497	1.11871	1.85727	0.185822
SSN6	3	X	6.61001	5.07555	1.24306	0.610799	0.344118	1.48102	0.244912
SSN6	1	Y	2.83886	2.36431	0.494527	-0.608542	-0.758025	0.151239	0.209163
SSN6	2	Y	2.82233	2.51587	0.624771	-0.616968	-0.668391	0.488518	0.248332
SSN6	3	Y	2.89483	2.47728	0.585077	-0.580375	-0.690691	0.393818	0.236177
RAP1	1	X	16.9902	14.1299	2.77346	1.97277	1.82123	2.63881	0.196284
RAP1	2	X	14.1786	12.4604	4.22353	1.71179	1.63983	3.24557	0.338955
RAP1	3	X	10.1873	8.88867	2.3456	1.23484	1.15252	2.39707	0.263886
RAP1	4	X	7.75983	5.97127	2.03223	0.842173	0.578591	2.19019	0.340335
RAP1	5	X	7.66523	5.54401	1.79609	0.824476	0.471482	2.01198	0.323969
RAP1	6	X	5.3476	5.27905	1.76095	0.305038	0.40083	1.98347	0.333574
SKO1	1	X	2.11707	1.99877	0.120747	-1.03179	-1.00033	-1.88282	0.0604106
SKO1	2	X	1.59218	1.51794	0.187896	-1.44285	-1.39733	-1.24487	0.123784
SKO1	3	X	1.92129	1.52525	0.213452	-1.17177	-1.3904	-1.0609	0.139945
SKO1	1	Y	1.74055	1.93248	0.262308	-1.31431	-1.049	-0.763544	0.135737
SKO1	2	Y	1.11276	1.56342	0.127157	-1.95971	-1.35474	-1.8082	0.0813326
SKO1	3	Y	1.13984	1.16641	0.136501	-1.92502	-1.77737	-1.7059	0.117026
WOR2	1	X	14.5755	13.0148	1.42205	1.75162	1.70263	1.67509	0.109264
WOR2	2	X	8.46562	5.12367	0.993804	0.967763	0.35773	1.15815	0.193963
WOR2	3	X	5.6101	4.36048	0.742777	0.374175	0.12504	0.73812	0.170343
WOR2	1	Y	4.22606	3.50853	0.51008	-0.0345395	-0.188579	0.195916	0.145383
WOR2	2	Y	4.4526	4.26127	0.62013	0.0407965	0.0918378	0.477763	0.145527
WOR2	3	Y	2.98238	2.20157	0.270217	-0.537387	-0.860912	-0.720691	0.122738
PHO4	1	X	12.7974	11.1328	1.48573	1.56393	1.47729	1.73829	0.133456
PHO4	2	X	15.8042	12.353	1.80153	1.86838	1.62734	2.01634	0.145837
PHO4	3	X	8.62545	4.95646	1.13274	0.994746	0.309864	1.34694	0.228538
PHO4	1	Y	7.50396	7.24537	1.28927	0.793798	0.857612	1.53368	0.177944
PHO4	2	Y	6.65277	6.16051	1.50161	0.620102	0.623603	1.75363	0.243747
PHO4	3	Y	6.51269	6.39163	1.41136	0.589402	0.676737	1.6642	0.220813
CWT1	1	X	11.25	10.2189	0.694303	1.378	1.35372	0.640757	0.0679431
CWT1	2	X	5.87505	4.8618	0.573912	0.440747	0.282045	0.366021	0.118045
CWT1	3	X	2.06157	2.13633	0.189395	-1.07011	-0.904314	-1.23341	0.0886543
CWT1	1	Y	2.19149	1.92768	0.343263	-0.981944	-1.05258	-0.375495	0.17807
CWT1	2	Y	1.7398	2.00785	0.274388	-1.31493	-0.993796	-0.698593	0.136657
CWT1	3	Y	1.82501	1.77985	0.294978	-1.24595	-1.16769	-0.594201	0.165732
AAF1	1	X	10.9271	10.0079	1.2865	1.33599	1.32362	1.53057	0.128548
AAF1	2	X	6.73551	5.75639	0.979121	0.637934	0.525716	1.13668	0.170093
AAF1	3	X	6.60991	6.3067	1.11292	0.610778	0.657438	1.32147	0.176467
AAF1	1	Y	5.98755	4.8794	0.956351	0.468113	0.287256	1.10273	0.195998
AAF1	2	Y	7.78333	5.98117	1.00421	0.846535	0.580981	1.17319	0.167896
AAF1	3	Y	6.95553	5.3254	0.874558	0.684307	0.413443	0.973746	0.164224
RIM101	1	X	10.3272	9.73644	0.92298	1.25453	1.28395	1.05149	0.0947964
RIM101	2	X	3.15955	2.6611	0.362522	-0.454133	-0.587427	-0.29674	0.13623
RIM101	3	X	4.5961	3.531	0.486	0.0865563	-0.17937	0.126148	0.137638
RIM101	1	Y	3.64009	2.80289	0.552072	-0.249877	-0.512531	0.310047	0.196965
RIM101	2	Y	3.7919	2.7855	0.533556	-0.190932	-0.521511	0.260831	0.191548
RIM101	3	Y	4.27401	3.07181	0.485404	-0.0182613	-0.38036	0.124379	0.158019
CRZ1	1	X	10.2498	8.78476	0.898704	1.24367	1.13556	1.01304	0.102303
CRZ1	2	X	2.10316	1.68195	0.170921	-1.0413	-1.24931	-1.38148	0.101621
CRZ1	3	X	2.05097	1.55924	0.204053	-1.07755	-1.35861	-1.12586	0.130867
CRZ1	1	Y	1.36528	1.27524	0.218518	-1.66465	-1.64868	-1.02705	0.171355
CRZ1	2	Y	2.28983	2.37064	0.366165	-0.918611	-0.754169	-0.282314	0.154458
CRZ1	3	Y	2.84641	2.22956	0.512982	-0.604708	-0.842688	0.204101	0.230082
TYE7	1	X	10.1721	8.9132	1.54148	1.23269	1.1565	1.79143	0.172943
TYE7	2	X	8.92328	8.11537	1.6918	1.04372	1.02121	1.92568	0.208468
TYE7	3	X	8.60893	6.07156	1.61883	0.991982	0.602621	1.86207	0.266624
TYE7	1	Y	8.17957	5.49656	1.55891	0.918173	0.459082	1.80766	0.283616
TYE7	2	Y	8.15374	6.5711	1.61215	0.913609	0.716689	1.85611	0.245339
TYE7	3	Y	6.5124	6.39587	1.47309	0.589338	0.677694	1.72597	0.230319
ZCF1	1	X	10.0014	9.16546	0.86641	1.20828	1.19676	0.960241	0.0945299
ZCF1	2	X	2.42698	1.98514	0.292567	-0.834692	-1.01021	-0.606042	0.147378
ZCF1	3	X	1.84044	1.53714	0.271849	-1.23381	-1.3792	-0.712001	0.176854
ZCF1	1	Y	3.18783	2.89832	0.502111	-0.441276	-0.464229	0.173197	0.173242
ZCF1	2	Y	3.09256	3.30532	0.483953	-0.485051	-0.274657	0.120058	0.146416
ZCF1	3	Y	3.07678	2.95492	0.514597	-0.49243	-0.436329	0.208634	0.174149
TAC1	1	X	9.56474	7.89902	0.642913	1.14387	0.982226	0.529815	0.0813915
TAC1	2	X	5.49423	5.39244	0.694651	0.344064	0.431491	0.64148	0.128819
TAC1	3	X	5.83356	5.42864	0.672641	0.430523	0.441143	0.595028	0.123906
TAC1	1	Y	3.65787	3.31246	0.50567	-0.242848	-0.271542	0.183388	0.152657
TAC1	2	Y	3.19894	2.97192	0.462243	-0.436259	-0.428054	0.0538421	0.155537
TAC1	3	Y	4.73669	3.15478	0.496956	0.130027	-0.341907	0.15831	0.157525
CUP9	1	X	2.52761	2.41579	0.271296	-0.77608	-0.726953	-0.71494	0.112301
CUP9	2	X	1.06698	1.08951	0.11023	-2.02032	-1.87577	-2.01429	0.101174
CUP9	3	X	1.31814	1.34313	0.126732	-1.71535	-1.57385	-1.81303	0.0943559
CUP9	1	Y	2.68808	2.46732	0.388996	-0.687277	-0.696502	-0.195052	0.15766
CUP9	2	Y	2.56212	2.57838	0.333101	-0.756513	-0.632984	-0.41885	0.12919
CUP9	3	Y	3.05834	3.02726	0.457629	-0.501103	-0.401437	0.0393687	0.151169
TEC1	1	X	3.31319	3.08616	0.358395	-0.385633	-0.373632	-0.31326	0.116129
TEC1	2	X	1.36875	1.44698	0.149297	-1.66099	-1.46641	-1.57662	0.103179
TEC1	3	X	1.48425	1.65953	0.162222	-1.54412	-1.26867	-1.45684	0.0977518
TEC1	1	Y	3.50045	3.09912	0.473249	-0.306314	-0.367588	0.0877912	0.152704
TEC1	2	Y	3.2258	3.26312	0.513367	-0.424196	-0.293195	0.205183	0.157324
TEC1	3	Y	3.77646	3.01511	0.322894	-0.196818	-0.407238	-0.463747	0.107092
HMS1	1	X	9.42786	8.04719	0.767095	1.12308	1.00904	0.784596	0.0953246
HMS1	2	X	6.56982	5.04765	0.832117	0.602	0.336166	0.901978	0.164852
HMS1	3	X	6.8487	5.18466	0.903726	0.661977	0.374801	1.02108	0.174308
HMS1	1	Y	4.38816	3.69476	0.592247	0.0197621	-0.113966	0.411391	0.160294
HMS1	2	Y	3.58605	3.34928	0.55318	-0.271458	-0.255596	0.312941	0.165164
HMS1	3	Y	4.00256	3.84149	0.564313	-0.112929	-0.0577823	0.341687	0.1469
RTG1	1	X	12.3886	11.0512	0.997408	1.51709	1.46668	1.16338	0.0902533
RTG1	2	X	7.25502	6.2767	0.976801	0.745126	0.650559	1.13326	0.155623
RTG1	3	X	7.21079	5.0445	0.954118	0.736304	0.335265	1.09936	0.18914
RTG1	1	Y	5.02518	5.6114	0.701083	0.215323	0.488913	0.654777	0.124939
RTG1	2	Y	5.02565	4.71789	0.833672	0.215457	0.238695	0.904671	0.176704
RTG1	3	Y	5.60697	4.90399	0.780641	0.373368	0.29451	0.80985	0.159185
HAP5	1	X	4.23868	3.65554	0.783668	-0.0302377	-0.129365	0.815433	0.214378
HAP5	2	X	3.29709	2.10201	0.582234	-0.39266	-0.927677	0.386791	0.276989
HAP5	3	X	2.49654	1.99993	0.546945	-0.793924	-0.999496	0.296588	0.273482
HAP5	1	Y	2.29049	2.22898	0.451732	-0.918195	-0.843064	0.0206593	0.202663
HAP5	2	Y	2.70756	3.78741	0.417598	-0.676857	-0.0782365	-0.092693	0.11026
HAP5	3	Y	2.35341	2.53861	0.449133	-0.879099	-0.655409	0.0123335	0.176921
TEA1	1	X	9.80506	9.61569	1.11625	1.17967	1.26594	1.32579	0.116087
TEA1	2	X	2.67086	2.26561	0.330166	-0.696549	-0.81955	-0.431618	0.14573
TEA1	3	X	2.80505	2.32859	0.35304	-0.625826	-0.779993	-0.334978	0.151611
TEA1	1	Y	2.34542	2.74365	0.394114	-0.884004	-0.543353	-0.176196	0.143646
TEA1	2	Y	2.73491	3.01405	0.356996	-0.662357	-0.407744	-0.3189	0.118444
TEA1	3	Y	2.79499	3.023	0.380869	-0.631008	-0.403468	-0.225516	0.12599
MSN4	1	X	1.2393	1.31173	0.0839341	-1.80433	-1.60797	-2.40748	0.0639872
MSN4	2	X	1.25517	0.940079	0.0803436	-1.78597	-2.08859	-2.47055	0.0854647
MSN4	3	X	1.59278	1.54744	0.151276	-1.44231	-1.36956	-1.55762	0.097759
MSN4	1	Y	1.0891	0.827754	0.0457756	-1.99072	-2.27217	-3.28216	0.055301
MSN4	2	Y	1.26829	0.710995	0	-1.77097	-2.49154	#NUM!	0
MSN4	3	Y	0.7428	0.616619	0	-2.54281	-2.697	#NUM!	0
UPC2	1	X	8.07678	7.0212	0.861777	0.899928	0.81227	0.952506	0.122739
UPC2	2	X	4.45653	3.71833	0.561865	0.0420684	-0.104794	0.335415	0.151107
UPC2	3	X	4.83271	3.81077	0.620559	0.158979	-0.069363	0.47876	0.162843
UPC2	1	Y	3.61774	4.1669	0.490659	-0.258762	0.0595266	0.139911	0.117752
UPC2	2	Y	4.67468	4.19039	0.588211	0.111014	0.0676383	0.401526	0.140371
UPC2	3	Y	3.49451	3.54713	0.325804	-0.308761	-0.172794	-0.450804	0.09185
CPH2	1	X	1.76439	1.71311	0.168986	-1.29468	-1.22283	-1.3979	0.0986431
CPH2	2	X	1.71419	1.6831	0.200864	-1.33633	-1.24832	-1.14859	0.119341
CPH2	3	X	1.52706	1.43311	0.183914	-1.5031	-1.4803	-1.27578	0.128332
CPH2	1	Y	0.659814	0.480805	0.0415752	-2.71372	-3.05592	-3.42101	0.0864699
CPH2	2	Y	0.912643	0.833447	0.0790551	-2.24573	-2.26228	-2.49388	0.0948532
CPH2	3	Y	0.76517	0.811977	0.075694	-2.5	-2.29994	-2.55656	0.0932218
HAP43	1	X	8.65318	7.5365	0.704889	0.999377	0.914448	0.662587	0.0935299
HAP43	2	X	2.77771	2.27624	0.315382	-0.639956	-0.812793	-0.497708	0.138554
HAP43	3	X	2.08064	2.15408	0.316467	-1.05682	-0.892375	-0.492752	0.146915
HAP43	1	Y	7.99825	7.65755	1.02509	0.885831	0.937435	1.20286	0.133866
HAP43	2	Y	6.59678	5.41486	0.740247	0.607909	0.437476	0.733199	0.136707
HAP43	3	Y	6.59756	5.80392	0.766165	0.60808	0.53758	0.782846	0.132008
C2_05640W	1	X	2.37413	2.1069	0.0849741	-0.866456	-0.924328	-2.38971	0.0403314
C2_05640W	2	X	0.560303	0.583942	0.0210396	-2.94957	-2.77555	-4.40363	0.0360303
C2_05640W	3	X	0.706251	0.82124	0.0434467	-2.6156	-2.28357	-3.35749	0.0529038
C2_05640W	1	Y	1.24383	1.29429	0.122537	-1.79906	-1.62728	-1.86159	0.0946748
C2_05640W	2	Y	0.880904	1.05217	0.11376	-2.2968	-1.92608	-1.96882	0.108119
C2_05640W	3	Y	1.01303	0.856396	0.117203	-2.09518	-2.2231	-1.9258	0.136856
CZF1	1	X	5.61731	4.77608	0.592269	0.376027	0.256381	0.411445	0.124007
CZF1	2	X	2.63879	2.57588	0.517838	-0.713976	-0.634381	0.217693	0.201033
CZF1	3	X	3.2352	3.09816	0.564664	-0.419999	-0.368037	0.342584	0.182258
CZF1	1	Y	4.3228	3.16943	0.524306	-0.00188793	-0.335225	0.2356	0.165426
CZF1	2	Y	4.23963	3.53353	0.545504	-0.0299148	-0.178338	0.292782	0.15438
CZF1	3	Y	5.06523	4.68984	0.713782	0.226775	0.230093	0.680674	0.152197
OFI1	1	X	5.72618	5.04428	0.316525	0.403721	0.335202	-0.492489	0.0627493
OFI1	2	X	3.39785	2.93902	0.430767	-0.349233	-0.444112	-0.0478998	0.146568
OFI1	3	X	3.23851	3.51668	0.528468	-0.418524	-0.185234	0.247007	0.150275
OFI1	1	Y	4.88239	3.96601	0.560745	0.173735	-0.0117599	0.332535	0.141388
OFI1	2	Y	3.33016	3.10213	0.425131	-0.37826	-0.366188	-0.0669012	0.137045
OFI1	3	Y	4.11326	3.66767	0.51452	-0.0735701	-0.124584	0.208418	0.140285
CTA7	1	X	4.60423	4.04216	0.352108	0.0891085	0.0156794	-0.33879	0.0871089
CTA7	2	X	3.95601	3.12367	0.50814	-0.129806	-0.356205	0.190418	0.162674
CTA7	3	X	3.62409	2.88816	0.528037	-0.256234	-0.469299	0.245831	0.182828
CTA7	1	Y	3.9821	3.31609	0.505117	-0.120325	-0.269963	0.181808	0.152323
CTA7	2	Y	3.75839	2.84617	0.477172	-0.203737	-0.490427	0.0997002	0.167654
CTA7	3	Y	3.19813	2.88379	0.421491	-0.436625	-0.471482	-0.0793054	0.146159
LEU3	1	X	6.6402	5.92587	0.770018	0.617374	0.567581	0.790083	0.129942
LEU3	2	X	4.16491	3.11969	0.717707	-0.0555674	-0.358045	0.688586	0.230057
LEU3	3	X	3.54684	3.37924	0.762542	-0.287317	-0.242749	0.776008	0.225655
LEU3	1	Y	4.35745	3.38229	0.52555	0.00963197	-0.241446	0.23902	0.155383
LEU3	2	Y	3.90627	3.23343	0.462997	-0.14806	-0.306384	0.0561944	0.143191
LEU3	3	Y	4.05691	3.39135	0.502624	-0.0934699	-0.237589	0.174671	0.148208
BCR1	1	X	4.99974	5.3869	0.327302	0.207999	0.430009	-0.444186	0.0607588
BCR1	2	X	2.16785	1.74138	0.286559	-0.997588	-1.19922	-0.635975	0.164559
BCR1	3	X	2.1392	1.49829	0.231711	-1.01678	-1.41613	-0.942479	0.154651
BCR1	1	X	4.56336	3.77583	0.438577	0.0762443	-0.0826516	-0.0219784	0.116154
BCR1	2	X	4.5091	3.97692	0.515717	0.0589872	-0.00779664	0.211771	0.129678
BCR1	3	X	4.23854	3.41281	0.433151	-0.0302869	-0.228488	-0.0399379	0.126919
RPN4	1	X	4.24726	3.75819	0.3409	-0.0273186	-0.0894083	-0.385461	0.0907084
RPN4	2	X	1.92632	1.70453	0.300586	-1.168	-1.23008	-0.567032	0.176346
RPN4	3	X	1.95302	1.42283	0.248814	-1.14814	-1.49068	-0.839742	0.174872
RPN4	1	Y	2.92155	2.41519	0.432369	-0.567118	-0.727312	-0.0425441	0.179021
RPN4	2	Y	3.10168	2.5512	0.445081	-0.480804	-0.648272	-0.000739167	0.17446
RPN4	3	Y	4.16457	3.55874	0.583291	-0.0556867	-0.168082	0.389407	0.163904
UME7	1	X	6.39196	5.67212	0.620304	0.562405	0.50444	0.478166	0.10936
UME7	2	X	2.61947	2.39477	0.334079	-0.72458	-0.739559	-0.414621	0.139503
UME7	3	X	2.01347	1.84323	0.262642	-1.10417	-1.11721	-0.761713	0.14249
UME7	1	X	4.21149	3.3075	0.491103	-0.0395217	-0.273705	0.141217	0.148482
UME7	2	X	3.79259	3.11259	0.498458	-0.190668	-0.361333	0.162664	0.160143
UME7	3	X	4.02494	3.46972	0.515137	-0.104886	-0.204628	0.210147	0.148466
orf19.173	1	X	5.32702	4.73152	0.509935	0.299476	0.242857	0.195503	0.107774
orf19.173	2	X	2.77062	1.98747	0.296447	-0.643643	-1.00851	-0.587035	0.149158
orf19.173	3	X	2.90805	2.5219	0.362953	-0.573802	-0.664934	-0.295026	0.14392
orf19.173	1	Y	2.50785	2.33469	0.50905	-0.787399	-0.776217	0.192998	0.218038
orf19.173	2	Y	3.10715	3.32598	0.450408	-0.478263	-0.265666	0.0164226	0.135421
orf19.173	3	Y	3.42956	3.32406	0.470157	-0.335828	-0.2665	0.0783354	0.141441
NTD80	1	X	3.90414	3.71733	0.325098	-0.148849	-0.105179	-0.453933	0.0874547
NTD80	2	X	5.24547	3.30347	0.658461	0.27722	-0.275465	0.564289	0.199324
NTD80	3	X	5.5657	3.43987	0.475804	0.36271	-0.217092	0.0955573	0.13832
NTD80	1	Y	6.7362	5.06875	0.790787	0.638082	0.342183	0.82848	0.156012
NTD80	2	Y	9.47784	6.1817	0.957267	1.13071	0.628556	1.10411	0.154855
NTD80	3	Y	8.97746	5.95353	0.885599	1.05246	0.574298	0.991845	0.148752
DAL81	1	X	5.64426	4.99381	0.699599	0.382933	0.320694	0.651719	0.140093
DAL81	2	X	1.51652	1.58381	0.256819	-1.51309	-1.33605	-0.794055	0.162153
DAL81	3	X	2.92235	2.779	0.362252	-0.566724	-0.524879	-0.297815	0.130353
DAL81	4	X	2.39321	2.28325	0.285994	-0.854908	-0.808358	-0.638826	0.125257
DAL81	5	X	2.65883	2.24514	0.293627	-0.703059	-0.832642	-0.600822	0.130784
DAL81	6	X	2.10738	2.07156	0.277948	-1.0384	-0.948733	-0.679995	0.134173
ARO80	1	X	5.30847	4.93442	0.538897	0.294442	0.303434	0.275202	0.109212
ARO80	2	X	4.95158	4.49622	0.600902	0.194035	0.169264	0.432321	0.133646
ARO80	3	X	2.74878	2.26718	0.291013	-0.655061	-0.818548	-0.613723	0.128359
ARO80	4	X	1.89513	1.66272	0.270092	-1.19156	-1.26591	-0.721358	0.16244
ARO80	5	X	1.90784	1.59449	0.243021	-1.18191	-1.32635	-0.873727	0.152413
ARO80	6	X	1.85236	1.7551	0.260626	-1.22449	-1.18789	-0.772828	0.148496
CSR1	1	X	5.37109	5.51654	0.601192	0.311361	0.464318	0.433017	0.10898
CSR1	2	X	4.12725	3.55847	0.616887	-0.0686714	-0.168188	0.470197	0.173357
CSR1	3	X	4.20237	3.6981	0.649901	-0.0426512	-0.112663	0.545412	0.175739
CSR1	1	Y	6.80329	5.23071	0.717851	0.652379	0.387559	0.688876	0.137238
CSR1	2	Y	6.34599	4.91757	0.762321	0.551992	0.298497	0.77559	0.15502
CSR1	3	Y	6.20733	5.68599	0.6969	0.52012	0.507964	0.646142	0.122564
ZCF38	1	X	2.85951	2.67416	0.214084	-0.598087	-0.580363	-1.05663	0.0800567
ZCF38	2	X	3.09738	2.9361	0.508255	-0.482804	-0.445548	0.190744	0.173106
ZCF38	3	X	3.32287	3.15753	0.538398	-0.381422	-0.34065	0.273865	0.170512
ZCF38	1	Y	6.09716	4.60863	0.664954	0.494284	0.204891	0.578446	0.144285
ZCF38	2	Y	5.9679	5.00453	0.732248	0.46337	0.323788	0.717524	0.146317
ZCF38	3	Y	5.32127	4.8357	0.7152	0.297919	0.274279	0.683539	0.1479
CRZ2	1	X	2.9	3.055	0.252655	-0.577798	-0.388273	-0.817642	0.0827019
CRZ2	2	X	3.5996	3.22113	0.561768	-0.266015	-0.311881	0.335165	0.174401
CRZ2	3	X	3.35114	2.76371	0.511888	-0.369203	-0.532839	0.201021	0.185218
CRZ2	1	Y	3.74648	3.55963	0.441158	-0.208319	-0.167718	-0.0135138	0.123933
CRZ2	2	Y	4.23915	3.49684	0.4935	-0.0300767	-0.193396	0.148241	0.141128
CRZ2	3	Y	3.77441	3.67788	0.46652	-0.197603	-0.120572	0.067131	0.126845
MRR2	1	X	3.1281	2.71263	0.236735	-0.468566	-0.559755	-0.911534	0.0872715
MRR2	2	X	1.9232	1.77596	0.281165	-1.17034	-1.17085	-0.663391	0.158317
MRR2	3	X	2.3459	2.05317	0.291268	-0.883714	-0.961596	-0.612462	0.141863
MRR2	1	Y	5.16277	4.4316	0.563887	0.254292	0.148381	0.340596	0.127242
MRR2	2	Y	5.19669	4.41407	0.633657	0.263739	0.142663	0.508894	0.143554
MRR2	3	Y	4.08097	3.39787	0.45216	-0.084942	-0.234818	0.0220247	0.133072
orf19.2730	1	X	3.3228	3.49729	0.247785	-0.381453	-0.193211	-0.845719	0.0708507
orf19.2730	2	X	1.909	1.55932	0.203332	-1.18103	-1.35853	-1.13097	0.130398
orf19.2730	3	X	2.24961	1.81198	0.28297	-0.94418	-1.14188	-0.654158	0.156166
orf19.2730	1	Y	4.72244	4.38509	0.591158	0.125678	0.13316	0.408735	0.134811
orf19.2730	2	Y	4.44951	3.90321	0.516329	0.0397925	-0.034787	0.213481	0.132283
orf19.2730	3	Y	3.88791	3.97429	0.514172	-0.154858	-0.00874893	0.207443	0.129375
STP4	1	X	3.40262	2.97646	0.240867	-0.347208	-0.42585	-0.886571	0.080924
STP4	2	X	3.73124	3.08931	0.514345	-0.214196	-0.372165	0.207929	0.166492
STP4	3	X	3.71745	2.92572	0.452497	-0.219538	-0.450654	0.0230996	0.154662
STP4	1	X	2.26938	2.25016	0.430793	-0.931551	-0.829419	-0.047813	0.19145
STP4	2	X	2.89386	2.40959	0.498266	-0.580858	-0.730658	0.162108	0.206784
STP4	3	X	3.413	2.83095	0.421855	-0.342811	-0.498161	-0.0780603	0.149015
ZCF23	1	X	3.41486	3.35292	0.293282	-0.342025	-0.254029	-0.602521	0.0874706
ZCF23	2	X	3.41689	3.08094	0.43858	-0.341171	-0.376078	-0.0219675	0.142353
ZCF23	3	X	2.89586	2.45391	0.371252	-0.579859	-0.704366	-0.262408	0.15129
ZCF23	1	Y	3.37755	3.32981	0.400716	-0.357875	-0.264007	-0.152227	0.120342
ZCF23	2	Y	4.0046	3.28795	0.439503	-0.112194	-0.282259	-0.0189364	0.133671
ZCF23	3	Y	3.64655	3.28731	0.388628	-0.247321	-0.282542	-0.196419	0.118221
RME1	1	X	3.41597	2.963	0.249158	-0.341557	-0.432387	-0.837745	0.0840898
RME1	2	X	4.18141	3.78047	0.546566	-0.0498629	-0.0808817	0.295588	0.144576
RME1	3	X	4.98354	4.24847	0.65878	0.203319	0.0874966	0.564988	0.155063
RME1	1	Y	4.60861	3.98778	0.52444	0.0904802	-0.00385984	0.23597	0.131512
RME1	2	Y	4.73488	3.96847	0.533447	0.129475	-0.0108648	0.260537	0.134421
RME1	3	Y	4.93812	4.19741	0.552746	0.19011	0.0700516	0.311807	0.131687

## Sheet: Mutant Summary
Standard Name	Whole Culture		Pellet Fraction		Supernatant Fraction		Whole Culture		Pellet Fraction		Supernatant Fraction		Supernatant to Pellet Ratio
	E,E-farnesol		E,E-farnesol		E,E-farnesol		E,E-farnesol		E,E-farnesol		E,E-farnesol		E,E-farnesol
	Mean Normalized Accumulation	SD	Mean Normalized Accumulation	SD	Mean Normalized Accumulation	SD	Mean Log2 Fold Change Accumlation vs SN152+	SD	Mean Log2 Fold Change Accumlation vs SN152+	SD	Mean Log2 Fold Change Accumlation vs SN152+	SD	Mean	SD
CR_02120C	5.79023	1.79644	5.46094	1.50298	0.587448	0.112977	0.357063	0.475891	0.402424	0.409636	0.373897	0.309814	0.109803	0.012225
FGR15	4.34044	0.733578	3.92981	0.437396	0.424817	0.0732354	-0.014296	0.255952	-0.0327383	0.165534	-0.0879555	0.270842	0.107674	0.0110448
GZF3	1.77273	0.374457	1.8126	0.288669	0.150605	0.0435458	-1.31662	0.320746	-1.15692	0.233169	-1.63513	0.541831	0.0823454	0.0194569
STP2	5.68891	0.995734	5.38029	0.884151	0.735247	0.11061	0.373693	0.275228	0.41233	0.233818	0.709898	0.216024	0.137697	0.0160278
C1_02720W	4.84706	1.80741	4.53821	1.22581	0.516209	0.181632	0.0665125	0.601687	0.133217	0.426246	0.12621	0.57262	0.111708	0.0151457
AHR1	21.5409	5.3462	18.9955	3.66548	2.67637	0.5649	2.26932	0.420551	2.22249	0.308266	2.5588	0.319972	0.141164	0.0137372
ASH1	7.90281	2.10591	6.9439	1.14205	0.853305	0.145334	0.819355	0.426874	0.778507	0.254101	0.91789	0.276269	0.123341	0.0142299
SWI4	26.4663	7.51604	22.5776	6.12613	4.0278	1.49227	2.56672	0.39007	2.45559	0.374315	3.10157	0.500229	0.175577	0.0243381
NRG1	14.9247	4.59171	14.8499	2.0131	1.78784	0.749994	1.72741	0.451587	1.88097	0.207678	1.92454	0.493748	0.119458	0.0422985
CAS5	1.94869	0.182625	1.55584	0.29681	0.317368	0.0672432	-1.15654	0.133575	-1.38496	0.288474	-0.51712	0.31804	0.207843	0.048889
FCR1	1.29101	0.760818	1.29579	0.759489	0.0954242	0.0713498	-1.96501	0.879091	-1.82884	0.840848	-3.68426	3.82803	0.0649294	0.0366784
TUP1	4.34416	0.456982	4.15436	0.987866	0.458483	0.173369	-0.00157808	0.154357	0.019636	0.355322	-0.0282207	0.469551	0.111299	0.0327185
SSN6	5.81966	3.50132	4.71029	2.72587	0.979101	0.468969	0.19585	0.902039	0.0305669	0.844326	0.988773	0.725185	0.218041	0.0291722
RAP1	10.3548	4.42079	8.71222	3.81492	2.48864	0.930471	1.14852	0.618778	1.01075	0.620048	2.41118	0.477357	0.2995	0.0581481
SKO1	1.60395	0.409745	1.61738	0.3064	0.174677	0.0565358	-1.47424	0.387994	-1.3282	0.281622	-1.41104	0.455349	0.109706	0.0318712
WOR2	6.71872	4.27362	5.41172	3.85345	0.759843	0.403778	0.427072	0.817565	0.204625	0.845754	0.587392	0.825583	0.14787	0.0308652
PHO4	9.64941	3.80162	8.03996	2.98518	1.43704	0.225604	1.07173	0.528526	0.928742	0.516457	1.67551	0.225573	0.191723	0.0460402
CWT1	4.15715	3.81568	3.82207	3.34344	0.39504	0.195496	-0.465698	1.11199	-0.413769	1.01604	-0.315821	0.699928	0.12585	0.0429697
AAF1	7.49983	1.77687	6.37616	1.84819	1.03561	0.145134	0.763943	0.305698	0.631409	0.36318	1.2064	0.194508	0.167204	0.0220311
RIM101	4.96482	2.67426	4.09812	2.77961	0.557089	0.191052	0.071314	0.609309	-0.149542	0.717067	0.262692	0.441631	0.152533	0.0383343
CRZ1	3.48424	3.34836	2.98357	2.87191	0.395224	0.277952	-0.677191	1.00212	-0.786316	0.998333	-0.433261	0.922192	0.148448	0.0486955
TYE7	8.425	1.19383	6.92728	1.3072	1.58271	0.0753044	0.948252	0.211118	0.772299	0.264009	1.82815	0.068779	0.234552	0.0401155
ZCF1	3.93767	3.01554	3.64105	2.78649	0.488581	0.214023	-0.379829	0.83496	-0.394643	0.88338	0.0240145	0.613314	0.152095	0.0313522
TAC1	5.41434	2.27422	4.69321	1.92577	0.579179	0.10195	0.22823	0.559615	0.13556	0.567303	0.360311	0.25648	0.133306	0.029185
CUP9	2.20355	0.809292	2.15356	0.761582	0.281331	0.140449	-1.07611	0.628353	-0.984584	0.592369	-0.852799	0.861049	0.124308	0.0262075
TEC1	2.77815	1.06448	2.595	0.813796	0.329904	0.152186	-0.753012	0.663664	-0.696122	0.525146	-0.586249	0.762756	0.122363	0.0260333
HMS1	5.80386	2.23514	4.86084	1.73068	0.702113	0.151665	0.337072	0.541674	0.215443	0.463638	0.628945	0.310563	0.15114	0.02877
RTG1	7.08536	2.78715	6.26762	2.41125	0.873954	0.120382	0.633777	0.494177	0.579104	0.459863	0.960881	0.204726	0.149308	0.0362102
HAP5	2.8973	0.750969	2.71875	0.798622	0.538552	0.135811	-0.615162	0.34319	-0.605541	0.405628	0.239852	0.336601	0.209116	0.0626549
TEA1	3.85938	2.91769	3.83176	2.85212	0.488573	0.308312	-0.386678	0.773266	-0.281361	0.778711	-0.0269035	0.668651	0.133585	0.0152759
MSN4	1.1979	0.277428	0.992437	0.363398	0.0602216	0.0578275	-1.88952	0.365803	-2.08781	0.512682	#NUM!	#NUM!	0.0504186	0.0418601
UPC2	4.85883	1.67053	4.40912	1.30443	0.574813	0.175428	0.107411	0.434121	0.0987474	0.361952	0.309552	0.460015	0.13111	0.0256224
CPH2	1.22388	0.499985	1.15926	0.518307	0.125015	0.0673241	-1.93226	0.628824	-1.92827	0.732387	-2.04895	0.91329	0.103477	0.0165021
HAP43	5.78402	2.72801	5.14053	2.4378	0.644706	0.278706	0.23407	0.862607	0.186962	0.829773	0.398506	0.717497	0.130263	0.0187238
orf19.6874	1.12974	0.654317	1.11916	0.539452	0.0838267	0.0426205	-2.10378	0.726426	-1.95998	0.636162	-2.65117	1.02504	0.0781525	0.0411321
CZF1	4.18649	1.10826	3.64049	0.900175	0.576394	0.07261	-0.0938294	0.406709	-0.171584	0.353298	0.363463	0.170853	0.163217	0.0265874
OFI1	4.11473	1.0083	3.70596	0.754829	0.462693	0.089913	-0.107022	0.33766	-0.132779	0.278524	0.0301118	0.302954	0.129718	0.0331447
CTA7	3.85383	0.465152	3.18334	0.458106	0.465344	0.066677	-0.17627	0.173579	-0.340283	0.194067	0.0499437	0.221715	0.149791	0.0332421
LEU3	4.44543	1.10928	3.73864	1.07695	0.623573	0.141168	0.00709855	0.315353	-0.136439	0.348194	0.454094	0.332915	0.172073	0.0440239
BCR1	3.76963	1.27545	3.29869	1.46479	0.37217	0.107522	-0.283571	0.56569	-0.417379	0.726956	-0.312131	0.436441	0.125453	0.0365338
RPN4	3.0524	1.01596	2.56845	0.94644	0.39184	0.120424	-0.574512	0.501741	-0.725639	0.558819	-0.241019	0.44276	0.159885	0.0342804
UME7	3.84232	1.51742	3.29999	1.31397	0.45362	0.130955	-0.266903	0.58	-0.365332	0.547011	-0.03069	0.461665	0.141407	0.0172204
orf19.173	3.34171	1.02115	3.03761	0.989687	0.433158	0.0859527	-0.41991	0.383869	-0.456496	0.449889	-0.0664667	0.312096	0.149292	0.036695
NDT80	6.65113	2.19588	4.61078	1.29297	0.682169	0.244748	0.552054	0.488936	0.157884	0.406571	0.521725	0.598268	0.147453	0.0360653
DAL81	2.87376	1.44115	2.65943	1.20659	0.362706	0.168849	-0.715541	0.630665	-0.688328	0.559898	-0.393299	0.53802	0.137136	0.0131973
ARO80	3.11069	1.60361	2.78502	1.52013	0.367425	0.158814	-0.627423	0.708178	-0.687666	0.73841	-0.379019	0.575913	0.139094	0.0192286
CSR1	5.50955	1.14008	4.7679	0.921643	0.674175	0.0622759	0.320755	0.312089	0.229581	0.295857	0.593206	0.132887	0.145483	0.0272363
ZCF38	4.44435	1.51035	3.86944	1.05595	0.56219	0.193672	-0.0344567	0.505361	-0.0939341	0.405089	0.231248	0.666883	0.143696	0.0336419
CRZ2	3.6018	0.449955	3.2957	0.347184	0.454581	0.107131	-0.274836	0.184968	-0.28578	0.156199	-0.0132664	0.411556	0.139038	0.0372506
MRR2	3.6396	1.40148	3.13088	1.14734	0.409812	0.165044	-0.348256	0.59732	-0.439329	0.556476	-0.219312	0.588722	0.131887	0.0242805
orf19.2730	3.42354	1.15217	3.18853	1.20037	0.392624	0.166329	-0.416009	0.535687	-0.433999	0.644315	-0.300199	0.653792	0.125647	0.0286305
STP4	3.23793	0.563478	2.74703	0.337493	0.426437	0.098023	-0.43936	0.275357	-0.551151	0.184553	-0.103218	0.400128	0.158221	0.0438251
ZCF23	3.45939	0.363409	3.13214	0.346061	0.38866	0.0540785	-0.330074	0.153461	-0.360547	0.173973	-0.20908	0.215498	0.125558	0.0225465
RME1	4.47709	0.59434	3.8576	0.469839	0.510856	0.13718	0.0369938	0.206575	-0.0617408	0.191481	0.138524	0.492758	0.130225	0.0243834

## Sheet: SN152+ Raw Data
Strain	Plate	Batch	Biological Replicate	Normalized Farnesol (Whole)	Normalized Farnesol (Pellet)	Normalized Farnesol (Supernatant)	FOH S:P	FOH WPS Relative Error	Batch Mean FOH whole	Batch Mean FOH pellet	Batch Mean FOH supernatant	FOH S:P Batch Mean
SN152+	X	1	1	5.53711	5.55622	0.591498	0.106457	0.110275	4.62928	4.51709	0.46055	0.100613
SN152+	X	1	2	3.72146	3.47797	0.329603	0.0947688	0.0231389
SN152+	X	2	1	4.21971	3.65108	0.360785	0.098816	0.0492539	5.39894	5.07281	0.457345	0.0914163
SN152+	X	2	2	6.47968	5.98306	0.473867	0.0792014	0.00351104
SN152+	X	2	3	5.49744	5.58428	0.537384	0.0962315	0.113549
SN152+	X	3	1	6.20408	6.76926	0.736531	0.108805	0.209816	6.36868	6.44532	0.655221	0.101478
SN152+	X	3	2	6.8211	6.36983	0.620093	0.0973483	0.02475
SN152+	X	3	3	6.08087	6.19688	0.60904	0.0982818	0.119234
SN152+	X	4	1	6.59669	6.06021	0.614487	0.101397	0.0118242	5.609	5.27796	0.592258	0.113094
SN152+	X	4	2	4.97968	4.92352	0.57079	0.115931	0.103346
SN152+	X	4	3	5.25064	4.85016	0.591496	0.121954	0.0363803
SN152+	X	5	1	6.61664	6.46634	0.691106	0.106878	0.0817336	6.28642	6.11714	0.723397	0.118598
SN152+	X	5	2	5.89647	5.82528	0.727793	0.124937	0.111355
SN152+	X	5	3	6.34615	6.05981	0.751293	0.12398	0.0732658
SN152+	X	6	1	7.54022	5.83401	0.775169	0.132871	0.123477	6.18335	5.22825	0.632758	0.120286
SN152+	X	6	2	5.04874	4.98671	0.575759	0.115459	0.101754
SN152+	X	6	3	5.9611	4.86403	0.547346	0.112529	0.0922178
SN152+	X	7	1	3.91825	3.33158	0.314739	0.0944716	0.0694025	4.29225	3.74994	0.350801	0.0936412
SN152+	X	7	2	4.66624	4.1683	0.386863	0.0928109	0.023805
SN152+	X	8	1	6.71906	5.09118	0.566881	0.111346	0.157908	5.34739	4.41413	0.404938	0.0904429
SN152+	X	8	2	4.43134	3.59487	0.302865	0.0842492	0.120417
SN152+	X	8	3	4.89176	4.55634	0.345069	0.0757337	0.00197145
SN152+	X	9	1	3.86497	3.49017	0.38195	0.109436	0.00185106	4.25657	4.10634	0.4276	0.107059
SN152+	X	9	2	3.62673	3.10593	0.369023	0.118812	0.0418486
SN152+	X	9	3	5.27801	5.72292	0.531826	0.092929	0.185059
SN152+	X	10	1	3.73421	3.41492	0.301545	0.0883022	0.00475221	4.01685	4.06268	0.359131	0.0884921
SN152+	X	10	2	4.49556	4.35221	0.470319	0.108064	0.0727329
SN152+	X	10	3	3.82079	4.42091	0.305528	0.0691096	0.237034
SN152+	X	11	1	3.98818	3.65546	0.304461	0.0832895	0.00708475	4.21115	3.82983	0.310621	0.0812453
SN152+	X	11	2	4.57759	4.20745	0.329796	0.0783837	0.00881254
SN152+	X	11	3	4.06769	3.62658	0.297607	0.0820626	0.0352794
SN152+	X	12	1	6.61664	6.46634	0.691106	0.106878	0.0817336	6.28642	6.11714	0.723397	0.118598
SN152+	X	12	2	5.89647	5.82528	0.727793	0.124937	0.111355
SN152+	X	12	3	6.34615	6.05981	0.751293	0.12398	0.0732658
SN152+	X	13	1	5.71473	5.74942	0.622907	0.108343	0.115072	5.76376	5.8081	0.639415	0.110073
SN152+	X	13	2	5.8128	5.86678	0.655922	0.111803	0.122127
SN152+	X	14	1	3.27138	3.42855	0.297853	0.0868745	0.139091	2.99327	3.23181	0.320673	0.100024
SN152+	X	14	2	2.71516	3.03507	0.343492	0.113174	0.244332
SN152+	Y	15	1	4.7598	4.71466	0.609691	0.129318	0.118609	4.53727	4.2985	0.597576	0.138084
SN152+	Y	15	2	4.184	4.4452	0.743181	0.167187	0.00104811
SN152+	Y	15	3	4.66801	3.73564	0.439856	0.117746	0.105508
SN152+	X	16	1	4.3532	3.75175	0.358658	0.0955974	0.0557719	3.80672	3.42451	0.360503	0.106293
SN152+	X	16	2	3.26025	3.09727	0.362348	0.116989	0.0611532
SN152+	Y	17	1	2.13149	1.65307	0.228958	0.138505	0.0417387	2.42873	1.85035	0.244093	0.132161
SN152+	Y	17	2	1.90262	1.70958	0.218651	0.127897	0.225358
SN152+	Y	17	3	3.25209	2.18841	0.284671	0.130081	0.0101535
SN152+	X	18	1	2.71108	2.37223	0.282736	0.119186	0.0207	2.46523	2.07842	0.276657	0.135402
SN152+	X	18	2	2.21937	1.78461	0.270577	0.151617	0.0739793
SN152+	X	19	1	3.61308	2.66606	0.441315	0.165531	0.139966	2.76206	2.14715	0.342303	0.157475
SN152+	X	19	2	1.91104	1.62824	0.24329	0.14942	0.0206783
SN152+	Y	20	1	1.86428	1.24921	0.187516	0.150108	0.229338	1.82668	1.38011	0.162308	0.120421
SN152+	Y	20	2	1.78908	1.51102	0.1371	0.0907335	0.0787914
SN152+	Y	21	1	2.41789	2.04014	0.319658	0.156684	0.0240256	2.49694	2.31809	0.34107	0.148157
SN152+	Y	21	2	2.576	2.59604	0.362483	0.139629	0.148495
SN152+	Y	22	1	3.78551	2.6595	0.43606	0.163963	0.182259	3.25906	2.4906	0.414196	0.166474
SN152+	Y	22	2	2.73262	2.3217	0.392331	0.168985	0.00680255

## Sheet: SN152+ Summary
	ALL Biological Replicates				ALL Batches
	E,E-farnesol Whole Culture				E,E-farnesol Whole Culture
	Mean	SD			Mean	SD
	4.48898	1.52641			4.32846	1.44341
	E,E-farnesol Pellet Fraction				E,E-farnesol Pellet Fraction
	Mean	SD			Mean	SD
	4.1563	1.56075			3.99847	1.50838
	E,E-farnesol Supernatant Fraction				E,E-farnesol Supernatant Fraction
	Mean	SD			Mean	SD
	0.459321	0.174653			0.44531	0.161442
	E,E-farnesol Pellet : Supernatant Ratio				E,E-farnesol Pellet : Supernatant Ratio
	Mean				Mean	SD
	0.113929	0.0248356			0.115433	0.0230053
	N=	56			N=	22
